# Supplementary material
Source: PubMed Central journal article supplement (PMC9971346)
Supplement: NIHMS1832530-supplement-Supplementary_Materials__figures__tables.pdf [file NIHMS1832530-supplement-Supplementary_Materials__figures__tables.pdf]

Appendix Table: Variables listed in Figure 2 and Table 2

| Abbreviated variable name     | Full variable name (and indication of reverse-scoring of standardized mean)                                                    |
|-------------------------------|--------------------------------------------------------------------------------------------------------------------------------|
| <b>Pain Domain</b>            |                                                                                                                                |
| Manikin: Head, neck, shoulder | Number of pain sites from the upper quarter of the body on the manikin                                                         |
| Neck familiar pain: palpation | Number of pain sites from the cervical region, replicating pain by history                                                     |
| Body familiar pain: palpation | Number of pain sites from the body below the cervical region, replicating pain by history                                      |
| Body pain: palpation          | Number of pain sites from the body below the cervical region                                                                   |
| Neck pain: palpation          | Number of pain sites from the cervical region                                                                                  |
| HA: pain days                 | Number of days of headache over prior 30 days                                                                                  |
| Manikin: torso, limbs         | Number of pain sites from the torso and limbs on the manikin                                                                   |
| HA: intensity                 | Headache: characteristic pain intensity from Graded Chronic Pain Scale                                                         |
| HA: interference              | Headache: pain-related interference from Graded Chronic Pain Scale                                                             |
| HA: disability days           | Headache: number of disability days from Graded Chronic Pain Scale                                                             |
| <b>TMD Domain</b>             |                                                                                                                                |
| MM familiar pain: evoked      | Number of pain sites, replicating pain by history, from either palpation or motion of masticatory muscles excluding temporalis |
| Non-specific jaw symptoms     | Non-specific jaw symptoms                                                                                                      |
| MM pain: evoked               | Number of pain sites from either palpation or motion of masticatory muscles excluding temporalis                               |
| TMD: pain days                | Number of days of TMD pain over prior 30 days                                                                                  |
| TMJ function                  | TMJ function by history, including clicking and locking                                                                        |
| TSK: Somatic                  | Tampa Scale for Kinesiophobia-TMD: somatic focus                                                                               |
| JFLS: Global                  | Jaw Functional Limitation Scale: global score                                                                                  |
| TSK: Activity                 | Tampa Scale for Kinesiophobia-TMD: activity avoidance                                                                          |
| OBC: Total                    | Oral Behaviors Checklist: sum score                                                                                            |
| Pain-free opening             | Pain-free opening of the jaw, mm (r)                                                                                           |
| TMD: intensity                | TMD: characteristic pain intensity from Graded Chronic Pain Scale                                                              |
| Maximum opening               | Maximum unassisted opening of the jaw, mm (r)                                                                                  |
| TMD: disability days          | TMD: number of disability days from Graded Chronic Pain Scale                                                                  |
| TMD: Interference             | TMD: pain-related interference from Graded Chronic Pain Scale                                                                  |
| <b>QST Domain</b>             |                                                                                                                                |
| PPT: temporalis               | PPT: temporalis muscle (r)                                                                                                     |
| PPT: trapezius                | PPT: trapezius muscle (r)                                                                                                      |

|                                   |                                                                                |
|-----------------------------------|--------------------------------------------------------------------------------|
| PPT: tibialis                     | PPT: anterior tibialis muscle (r)                                              |
| Pinprick pain: threshold          | Mechanical cutaneous pinprick: threshold (r)                                   |
| Pinprick pain: single stimulus    | Mechanical cutaneous pinprick: pain rating following a single stimulus (0-100) |
| Heat pain: aftersensation         | Heat pain: rating of after-sensation (0-100)                                   |
| Heat pain: AUC                    | Heat pain: AUC of pain rating from 10-stimuli (0-100)                          |
| Pinprick pain: aftersensation     | Mechanical cutaneous pinprick: rating of after-sensation (0-100)               |
| Heat pain: 10 stimuli             | Heat pain: pain rating after series of 10 stimuli (0-100)                      |
| Pinprick pain: 10 stimuli         | Mechanical cutaneous pinprick: pain rating after series of 10 stimuli (0-100)  |
| Heat pain: temporal summation     | Heat pain: temporal summation (0 to 100)                                       |
| Heat pain: single stimulus        | Heat pain: pain rating following a single stimulus (0-100)                     |
| Heat pain: tolerance              | Heat pain: tolerance, °C (r)                                                   |
| Heat pain: threshold              | Heat pain: threshold, °C (r)                                                   |
| Pinprick pain: temporal summation | Mechanical cutaneous pinprick: temporal summation (-100 to 100)                |
| <b>Psychosocial Domain</b>        |                                                                                |
| SCL90R: Physical symptoms         | Symptom Checklist-90-Revised: Somatization subscale                            |
| PILL                              | Pennebaker Index of Limbic Languidness                                         |
| SCL90R: Depression                | Symptom Checklist-90-Revised: Depression subscale                              |
| POMS: Negative affect             | Profile of Mood States: negative affectivity                                   |
| STAI-Y                            | State Trait Anxiety Inventory: trait scale                                     |
| PSS                               | Perceived Stress Scale-14                                                      |
| PTSD                              | Modified Post-traumatic Stress Disorder Symptom Scale (MPSS)                   |
| CSQ: Catastrophizing              | Coping Strategies Questionnaire-Revised: Catastrophizing subscale              |
| LES: sum score                    | Life Experiences Survey: sum of negative impact scores                         |
| CSQ: Distancing                   | Coping Strategies Questionnaire-Revised: Distancing subscale                   |
| CSQ: Distraction                  | Coping Strategies Questionnaire-Revised: Distraction subscale                  |
| CSQ: Coping                       | Coping Strategies Questionnaire-Revised: Coping statements subscale            |
| CSQ: Ignore Pain                  | Coping Strategies Questionnaire-Revised: Ignoring Pain subscale                |
| CSQ: Praying                      | Coping Strategies Questionnaire-Revised: Praying subscale                      |
| <b>Health Domain</b>              |                                                                                |
| Fatigue                           | PROMIS Fatigue score                                                           |
| Health Conditions                 | Number of health conditions                                                    |
| PSQI: total                       | Pittsburgh Sleep Quality Index total score for sleep disturbance               |
| SF12v2: Mental                    | SF12-version2: Mental Composite Summary                                        |

|                  |                                           |
|------------------|-------------------------------------------|
| SF12v2: Physical | SF12-version2: Physical Composite Summary |
| Allergies        | Number of allergies                       |
| SBP              | Systolic blood pressure                   |
| Heart rate       | Heart rate                                |
| DBP              | Diastolic blood pressure                  |
| Sleeping hours   | Number hours of sleep                     |
| BMI              | Body mass index (kg/m <sup>2</sup> )      |

MM: masticatory muscle

PPT: pressure pain threshold

TMJ: temporomandibular joint

TMD: temporomandibular disorder

(r): reverse scoring
